# Supplementary material
Source: PubMed Central journal article supplement (PMC7655282)
Supplement: 18-00101.pdf [file 18-00101.pdf]

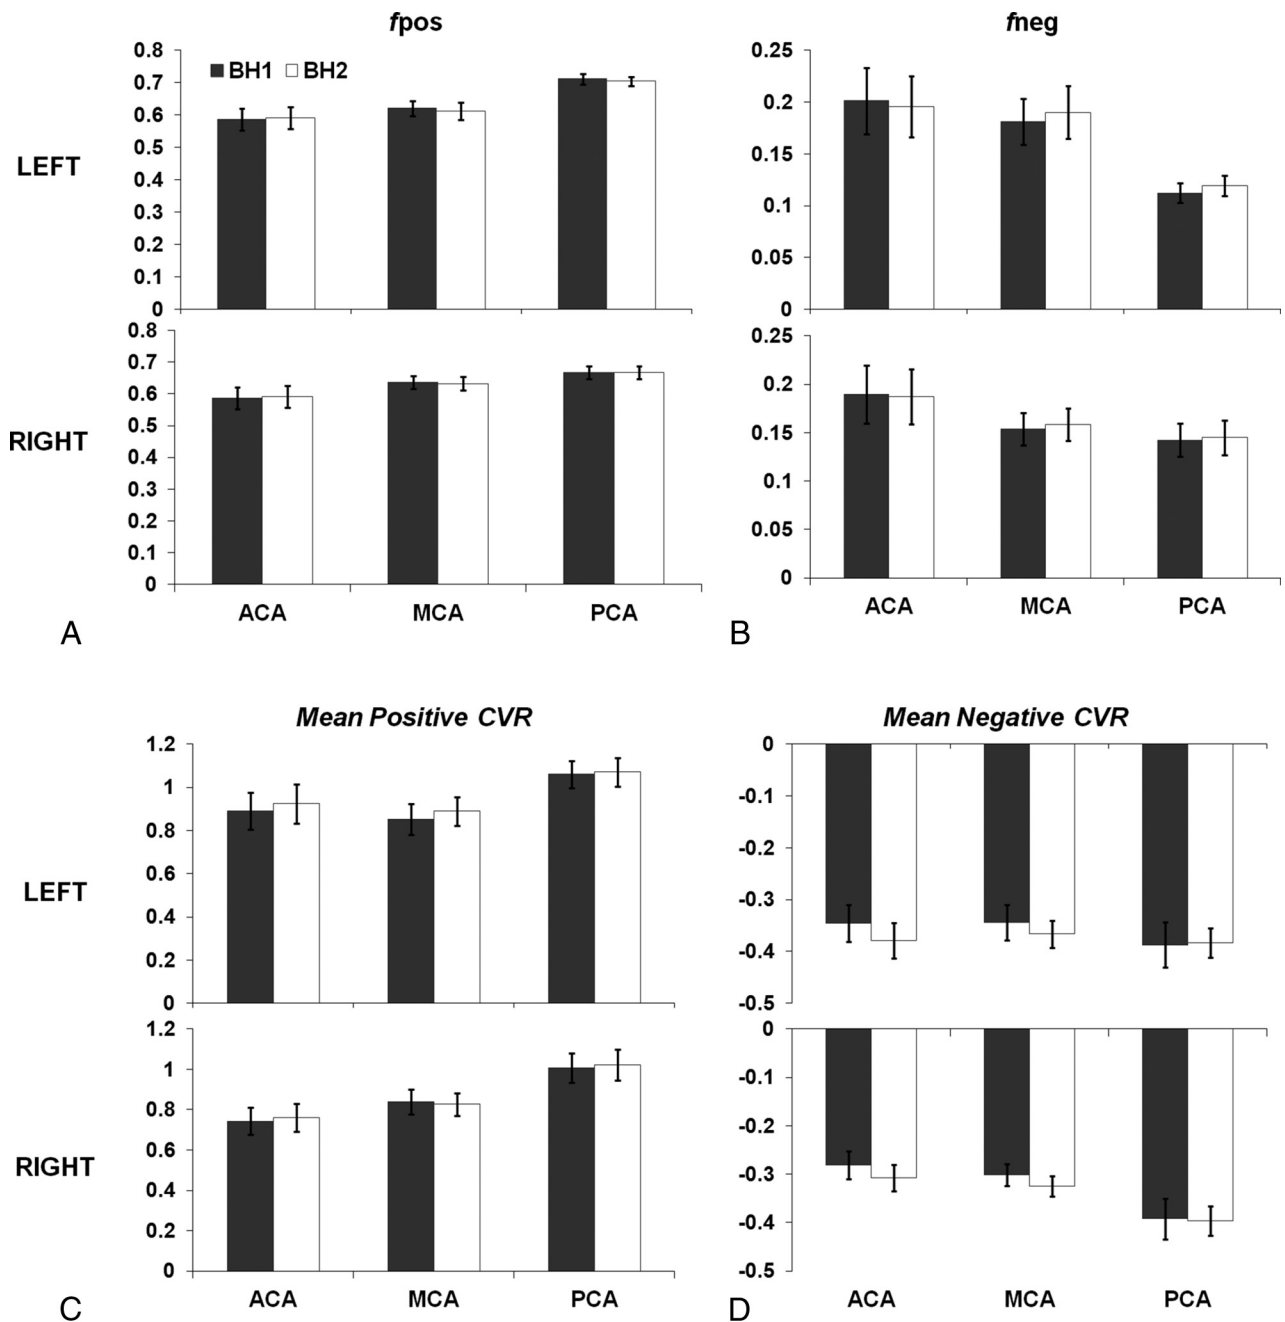

**ON-LINE FIG 1.** BH-CVR estimates of relative positive ( $f_{pos}$ ) (A) and negative ( $f_{neg}$ ) (B) voxel counts and their respective magnitudes (C and D) in 3 major vascular territories. Error bars represent standard errors. Upper row of each figure represents estimates from the left hemisphere, and the lower row represents estimates from the right hemisphere.

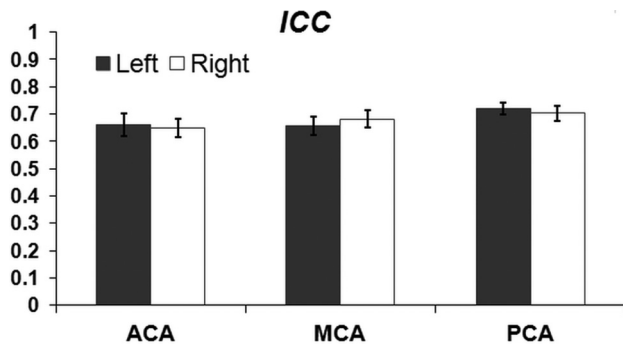

**ON-LINE FIG 2.** Intraclass correlation coefficient estimates among repeat BH-CVR scans across vascular territories in the left and the right hemispheres.

**On-line Table 1: Patient demographics and corresponding repeatability metrics of BH-CVR studies**

| Patient ID                     | Age at Diagnosis (yr) |                                | Sex | Moyamoya Classification  | Clinical Presentation     | Study No. | Age at CVR (yr) |                                | BH Issues                      | GM               |              | WM               |              | Study Quality Using ICC <sup>b</sup> |
|--------------------------------|-----------------------|--------------------------------|-----|--------------------------|---------------------------|-----------|-----------------|--------------------------------|--------------------------------|------------------|--------------|------------------|--------------|--------------------------------------|
|                                | 6.0                   | 8.3                            |     |                          |                           |           | 12.5            | 15.3                           |                                | ICC (95% CI)     | CV%          | ICC (95% CI)     | CV%          |                                      |
| P01                            | 6.0                   | 8.3                            | M   | Familial                 | Stroke                    | 1         | 12.5            | 15.3                           | NC                             | 0.93 (0.92-0.93) | 2.4          | 0.83 (0.81-0.85) | 9.4          | Excellent                            |
| P02                            | 8.3                   | 7.0                            | M   | Neurofibromatosis type 1 | Asymptomatic <sup>a</sup> | 1         | 9.9             | 8.6                            | NC                             | 0.74 (0.72-0.76) | 1.27         | 0.67 (0.64-0.69) | 4.41         | Excellent                            |
| P03                            | 7.0                   | 5.5                            | M   | SCD                      | Asymptomatic <sup>a</sup> | 1         | 8.6             | 11.8                           | NC                             | 0.51 (0.47-0.55) | 15.49        | 0.55 (0.51-0.59) | 23.44        | Fair                                 |
| P04                            | 5.5                   | 8.3                            | F   | Idiopathic               | TIA and headache          | 2         | 12.6            | 16.0                           | NC                             | 0.80 (0.78-0.82) | 0.10         | 0.74 (0.71-0.76) | 9.8          | Excellent                            |
| P05                            | 8.3                   | 6.0                            | F   | Idiopathic               | Headache                  | 1         | 11.8            | 10.1                           | NC                             | 0.82 (0.80-0.83) | 2.3          | 0.84 (0.82-0.85) | 8.10         | Excellent                            |
| P06                            | 6.0                   | 10.0                           | M   | Idiopathic               | TIA                       | 2         | 16.0            | 11.5                           | NC                             | 0.92 (0.91-0.92) | 1.0          | 0.91 (0.91-0.92) | 2.0          | Excellent                            |
| P07                            | 10.0                  | 9.0                            | M   | Idiopathic               | TIA                       | 1         | 16.6            | 8.9                            | NC                             | 0.89 (0.88-0.90) | 3.16         | 0.88 (0.86-0.89) | 1.11         | Excellent                            |
| P08                            | 9.0                   | 8.0                            | M   | Idiopathic               | Stroke                    | 1         | 11.5            | 13.2                           | NC                             | 0.32 (0.27-0.36) | 11.62        | 0.32 (0.27-0.36) | 18.64        | Poor                                 |
| P09                            | 8.0                   | 6.0                            | F   | Neurofibromatosis type 1 | Asymptomatic <sup>a</sup> | 1         | 14.0            | 14.3                           | NC                             | 0.90 (0.89-0.91) | 16.20        | 0.88 (0.87-0.90) | 17.31        | Excellent                            |
| P10                            | 6.0                   | 8.0                            | F   | Idiopathic               | TIA                       | 2         | 16.0            | 16.4                           | NC                             | 0.71 (0.69-0.73) | 4.26         | 0.69 (0.66-0.72) | 2.20         | Good                                 |
| P11                            | 8.0                   | 4.0                            | M   | Idiopathic               | Headache                  | 3         | 8.9             | 12.1                           | NC                             | 0.74 (0.72-0.76) | 13.14        | 0.66 (0.63-0.69) | 6.5          | Good                                 |
| P12                            | 11.3                  | 4.0                            | F   | ACTA2                    | Asymptomatic              | 1         | 17.4            | 12.0                           | NC                             | 0.83 (0.81-0.84) | 9.17         | 0.79 (0.78-0.81) | 0.9          | Excellent                            |
| P13                            | 4.0                   | 10.3                           | F   | Idiopathic               | TIA                       | 2         | 11.1            | 17.0                           | NC                             | 0.61 (0.58-0.64) | 7.18         | 0.59 (0.55-0.63) | 4.17         | Good                                 |
| P14                            | 10.3                  | 6.0                            | F   | SCD                      | Asymptomatic <sup>a</sup> | 3         | 15.9            | 9.3                            | NC                             | 0.81 (0.79-0.82) | 0.14         | 0.83 (0.81-0.85) | 3.11         | Excellent                            |
| P15                            | 6.0                   | 9.0                            | F   | Idiopathic               | TIA                       | 4         | 13.2            | 12.0                           | NC                             | 0.73 (0.70-0.75) | 9.14         | 0.77 (0.75-0.79) | 3.9          | Excellent                            |
| P16                            | 9.0                   | 7.5                            | M   | Idiopathic               | TIA                       | 1         | 17.4            | 14.4                           | NC                             | 0.33 (0.29-0.37) | 5.10         | 0.43 (0.39-0.47) | 9.15         | Poor                                 |
| P17                            | 7.5                   | 10.5                           | M   | Neurofibromatosis type 1 | Asymptomatic <sup>a</sup> | 2         | 11.1            | 18.0                           | NC                             | 0.79 (0.78-0.81) | 10.2         | 0.82 (0.81-0.84) | 10.6         | Excellent                            |
| P18                            | 10.5                  | 1.4                            | F   | Neurofibromatosis type 1 | Headache                  | 3         | 12.1            | 17.4                           | NC                             | 0.82 (0.80-0.83) | 7.8          | 0.85 (0.84-0.86) | 11.18        | Excellent                            |
| P19                            | 1.4                   | 16.8                           | M   | Idiopathic               | Stroke                    | 4         | 13.2            | 14.4                           | NC                             | 0.77 (0.75-0.79) | 19.40        | 0.79 (0.77-0.81) | 20.14        | Excellent                            |
| P20                            | 16.8                  | Mean (excluding NC and motion) | M   | Radiation vasculopathy   | Asymptomatic <sup>a</sup> | 1         | 18.0            | Mean (excluding NC and motion) | Mean (excluding NC and motion) | 0.70 ± 0.19      | 9.1 ± 8.2    | 0.69 ± 0.20      | 8.6 ± 8.0    | Excellent                            |
| Mean (excluding NC and motion) |                       |                                |     |                          |                           |           |                 |                                |                                | 0.77 ± 0.12      | -22.5 ± 18.3 | 0.76 ± 0.12      | -20 ± 17.1   |                                      |
|                                |                       |                                |     |                          |                           |           |                 |                                |                                |                  | 7.6 ± 6.1    |                  | 7.3 ± 6.3    |                                      |
|                                |                       |                                |     |                          |                           |           |                 |                                |                                |                  | -18.9 ± 13.8 |                  | -16.1 ± 12.1 |                                      |

**Note:**—NC indicates noncompliant; Motion, excessive motion; ID, identification.

<sup>a</sup>Diagnosis made following screening imaging study.

<sup>b</sup>Study quality based on whole-brain ICC.

**On-line Table 2: Estimates of BH-CVR in 20 patients with 30 repeat scans (includes all follow-up studies)**

| Patient ID | Mean Magnitude |      |      |              |       |       | Mean Count   |       |      |              |      |      | Mean Magnitude CVR (Positive and Negative Combined) |      |      |      |      |      |      |      |
|------------|----------------|------|------|--------------|-------|-------|--------------|-------|------|--------------|------|------|-----------------------------------------------------|------|------|------|------|------|------|------|
|            | Positive CVR   |      |      | Negative CVR |       |       | Positive CVR |       |      | Negative CVR |      |      | GM                                                  |      |      | WM   |      |      |      |      |
|            | GM             | WM   |      | GM           | WM    |       | GM           | WM    |      | GM           | WM   |      | GM                                                  | WM   |      | GM   | WM   |      |      |      |
|            | A              | B    | A    | A            | B     | A     | A            | B     | A    | A            | B    | A    | A                                                   | B    | A    | A    | B    | A    | B    |      |
| P01        | 0.66           | 0.64 | 0.58 | 0.51         | 0.51  | -0.55 | -0.52        | -0.33 | 0.38 | 0.40         | 0.44 | 0.44 | 0.43                                                | 0.42 | 0.55 | 0.54 | 0.02 | 0.04 | 0.06 | 0.05 |
| P02        | 0.95           | 0.97 | 0.48 | 0.51         | 0.48  | -0.29 | -0.43        | -0.31 | 0.71 | 0.61         | 0.76 | 0.58 | 0.13                                                | 0.24 | 0.23 | 0.41 | 0.64 | 0.49 | 0.33 | 0.17 |
| P03        | 0.94           | 1.16 | 0.47 | 0.65         | -0.44 | -0.37 | -0.76        | -0.44 | 0.62 | 0.56         | 0.56 | 0.55 | 0.18                                                | 0.25 | 0.36 | 0.37 | 0.51 | 0.46 | 0.18 | 0.20 |
| P04a       | 0.80           | 0.80 | 0.44 | 0.39         | -0.17 | -0.31 | -0.27        | -0.19 | 0.83 | 0.86         | 0.84 | 0.84 | 0.12                                                | 0.10 | 0.16 | 0.16 | 0.62 | 0.66 | 0.34 | 0.30 |
| P04b       | 0.78           | 0.80 | 0.48 | 0.43         | -0.43 | -0.24 | -0.25        | -0.13 | 0.76 | 0.75         | 0.82 | 0.79 | 0.09                                                | 0.10 | 0.17 | 0.20 | 0.58 | 0.58 | 0.37 | 0.31 |
| P05a       | 1.19           | 1.20 | 0.73 | 0.75         | -0.28 | -0.56 | -0.56        | -0.28 | 0.68 | 0.70         | 0.78 | 0.81 | 0.16                                                | 0.15 | 0.21 | 0.18 | 0.72 | 0.76 | 0.52 | 0.56 |
| P05b       | 1.29           | 1.34 | 0.77 | 0.76         | -0.43 | -0.43 | -0.54        | -0.30 | 0.69 | 0.66         | 0.72 | 0.70 | 0.16                                                | 0.20 | 0.27 | 0.29 | 0.82 | 0.78 | 0.47 | 0.43 |
| P06        | 0.81           | 0.95 | 0.50 | 0.65         | -0.31 | -0.31 | -0.79        | -0.22 | 0.57 | 0.41         | 0.65 | 0.46 | 0.26                                                | 0.40 | 0.32 | 0.52 | 0.39 | 0.07 | 0.25 | 0.00 |
| P07        | 1.17           | 1.47 | 0.79 | 1.01         | -0.31 | -0.41 | -0.41        | -0.23 | 0.67 | 0.68         | 0.85 | 0.88 | 0.08                                                | 0.07 | 0.12 | 0.10 | 0.76 | 0.96 | 0.64 | 0.85 |
| P08        | 0.56           | 0.59 | 0.45 | 0.46         | -0.18 | -0.18 | -0.26        | -0.15 | 0.69 | 0.68         | 0.74 | 0.73 | 0.17                                                | 0.17 | 0.23 | 0.23 | 0.36 | 0.36 | 0.30 | 0.29 |
| P09-1      | 0.98           | 0.82 | 0.51 | 0.47         | -0.36 | -0.36 | -0.44        | -0.25 | 0.70 | 0.66         | 0.71 | 0.70 | 0.17                                                | 0.20 | 0.29 | 0.29 | 0.63 | 0.45 | 0.29 | 0.25 |
| P09-2      | 1.09           | 1.24 | 0.54 | 0.54         | -0.30 | -0.30 | -0.38        | -0.21 | 0.75 | 0.76         | 0.80 | 0.80 | 0.13                                                | 0.12 | 0.19 | 0.20 | 0.78 | 0.90 | 0.39 | 0.39 |
| P10-1      | 0.49           | 0.54 | 0.33 | 0.31         | -0.20 | -0.20 | -0.26        | -0.15 | 0.73 | 0.72         | 0.71 | 0.66 | 0.20                                                | 0.22 | 0.28 | 0.33 | 0.32 | 0.34 | 0.19 | 0.14 |
| P10-2      | 0.58           | 0.58 | 0.42 | 0.40         | -0.18 | -0.18 | -0.22        | -0.12 | 0.72 | 0.71         | 0.79 | 0.79 | 0.11                                                | 0.12 | 0.19 | 0.19 | 0.40 | 0.39 | 0.31 | 0.29 |
| P10-3      | 0.81           | 0.71 | 0.49 | 0.47         | -0.39 | -0.39 | -0.32        | -0.24 | 0.57 | 0.58         | 0.56 | 0.62 | 0.24                                                | 0.23 | 0.41 | 0.35 | 0.37 | 0.34 | 0.17 | 0.22 |
| P11-1      | 1.09           | 1.02 | 0.72 | 0.63         | -0.53 | -0.53 | -0.46        | -0.31 | 0.65 | 0.69         | 0.78 | 0.75 | 0.16                                                | 0.15 | 0.21 | 0.24 | 0.63 | 0.63 | 0.50 | 0.41 |
| P11-2      | 1.08           | 1.24 | 0.64 | 0.74         | -0.41 | -0.41 | -0.40        | -0.23 | 0.73 | 0.75         | 0.79 | 0.82 | 0.11                                                | 0.09 | 0.19 | 0.17 | 0.74 | 0.89 | 0.46 | 0.57 |
| P11-3      | 1.25           | 1.39 | 0.79 | 0.92         | -0.56 | -0.56 | -0.63        | -0.31 | 0.72 | 0.74         | 0.85 | 0.91 | 0.11                                                | 0.09 | 0.13 | 0.07 | 0.84 | 0.97 | 0.63 | 0.81 |
| P11-4      | 1.32           | 1.01 | 0.81 | 0.61         | -0.52 | -0.52 | -0.29        | -0.22 | 0.77 | 0.73         | 0.93 | 0.83 | 0.06                                                | 0.10 | 0.06 | 0.16 | 0.98 | 0.71 | 0.74 | 0.48 |
| P12        | 1.17           | 1.05 | 0.70 | 0.65         | -0.37 | -0.37 | -0.60        | -0.25 | 0.70 | 0.65         | 0.81 | 0.73 | 0.13                                                | 0.18 | 0.17 | 0.25 | 0.78 | 0.57 | 0.53 | 0.39 |
| P13-1      | 0.69           | 0.82 | 0.55 | 0.53         | -0.37 | -0.37 | -0.52        | -0.27 | 0.65 | 0.61         | 0.72 | 0.65 | 0.25                                                | 0.27 | 0.26 | 0.31 | 0.36 | 0.37 | 0.32 | 0.24 |
| P13-2      | 0.84           | 0.91 | 0.67 | 0.70         | -0.31 | -0.31 | -0.37        | -0.22 | 0.55 | 0.58         | 0.69 | 0.72 | 0.20                                                | 0.18 | 0.25 | 0.22 | 0.40 | 0.46 | 0.41 | 0.45 |
| P13-3      | 0.93           | 0.84 | 0.71 | 0.64         | -0.38 | -0.38 | -0.31        | -0.24 | 0.62 | 0.63         | 0.73 | 0.71 | 0.18                                                | 0.16 | 0.21 | 0.24 | 0.50 | 0.48 | 0.47 | 0.41 |
| P14        | 1.23           | 0.96 | 0.70 | 0.58         | -0.97 | -0.97 | -0.51        | -0.50 | 0.54 | 0.69         | 0.58 | 0.75 | 0.34                                                | 0.19 | 0.41 | 0.24 | 0.34 | 0.56 | 0.20 | 0.37 |
| P15        | 0.56           | 0.60 | 0.41 | 0.41         | -0.29 | -0.29 | -0.43        | -0.24 | 0.48 | 0.44         | 0.58 | 0.55 | 0.32                                                | 0.36 | 0.40 | 0.43 | 0.18 | 0.11 | 0.14 | 0.10 |
| P16        | 0.65           | 0.87 | 0.52 | 0.66         | -0.25 | -0.25 | -0.46        | -0.20 | 0.63 | 0.57         | 0.73 | 0.67 | 0.19                                                | 0.25 | 0.26 | 0.32 | 0.36 | 0.39 | 0.33 | 0.34 |
| P17        | 1.24           | 0.88 | 0.72 | 0.44         | -1.26 | -1.26 | -0.39        | -0.63 | 0.49 | 0.68         | 0.48 | 0.73 | 0.39                                                | 0.19 | 0.51 | 0.26 | 0.12 | 0.53 | 0.02 | 0.26 |
| P18        | 1.03           | 1.02 | 0.53 | 0.55         | -0.31 | -0.31 | -0.31        | -0.20 | 0.75 | 0.75         | 0.78 | 0.78 | 0.11                                                | 0.10 | 0.21 | 0.21 | 0.74 | 0.74 | 0.37 | 0.39 |
| P19        | 0.50           | 0.83 | 0.42 | 0.51         | -0.32 | -0.32 | -0.55        | -0.29 | 0.50 | 0.41         | 0.61 | 0.47 | 0.27                                                | 0.38 | 0.32 | 0.47 | 0.16 | 0.13 | 0.16 | 0.02 |
| P20        | 1.75           | 1.64 | 0.97 | 0.98         | -0.63 | -0.63 | -0.52        | -0.28 | 0.75 | 0.74         | 0.81 | 0.83 | 0.10                                                | 0.10 | 0.17 | 0.15 | 1.24 | 1.17 | 0.73 | 0.78 |
| Mean       | 0.95           | 0.96 | 0.59 | 0.60         | -0.41 | -0.41 | -0.44        | -0.25 | 0.65 | 0.65         | 0.72 | 0.71 | 0.18                                                | 0.19 | 0.26 | 0.27 | 0.54 | 0.54 | 0.36 | 0.35 |
| SD         | 0.30           | 0.28 | 0.15 | 0.17         | 0.23  | 0.23  | 0.15         | 0.10  | 0.10 | 0.11         | 0.12 | 0.12 | 0.09                                                | 0.10 | 0.11 | 0.12 | 0.27 | 0.28 | 0.18 | 0.21 |
